# Supplementary material for: Detailed Analysis of Sequence Changes Occurring during vlsE Antigenic Variation in the Mouse Model of Borrelia burgdorferi Infection
Source: PubMed Central journal article supplement (PMC2632889; doi:10.1371/journal.ppat.1000293), 2009-02-13
Supplement: ppat.1000293.s001.pdf [file ppat.1000293.s001.pdf]

**Table S1. *B. burgdorferi* vlsE variant clones with template-independent sequence changes<sup>a</sup>**

| Clone Name | No. codons affected | Nt differences | Codon(s) <sup>b</sup> | Sequence change(s) <sup>c</sup>                          | NCBI Accession Number |
|------------|---------------------|----------------|-----------------------|----------------------------------------------------------|-----------------------|
| SD28M1HX4  | 3                   | -9             | 163-165               | GCGGAGTTT → OOOOOOOOO; 9 bp deletion                     | EU485914              |
| D10M8B2    | 3                   | -9             | 42-44                 | GCAAAGGTT → OOOOOOOOO; 9 bp deletion                     | EU484884              |
| D7M5H03    | 1                   | -6             | 159-160               | GGGGGT → OOOOOO; 6 bp deletion, same as D7M5H04          | EU484717              |
| D7M5H04    | 1                   | -6             | 159-160               | GGGGGT → OOOOOO; 6 bp deletion, same as D7M5H03          | EU484718              |
| D7M5H08    | 1                   | -6             | 159-160               | GGGGGT → OOOOOO; 6 bp deletion, same as D7M5H13, D7M5H09 | EU484722              |
| D7M5H09    | 2                   | -6             | 159-160               | GGGGGT → OOOOOO; 6 bp deletion, same as D7M5H08, D7M5H13 | EU484723              |
| D7M5H13    | 2                   | -6             | 159-160               | GGGGGT → OOOOOO; 6 bp deletion, same as D7M5H08, D7M5H09 | EU484752              |
| D7M5H05    | 2                   | -6             | 163-164               | GCGGAG → OOOOOO; 6 bp deletion                           | EU484719              |
| D10M9B4    | 2                   | -6             | 41-42                 | GCTGCA → OOOOOO; 6 bp deletion                           | EU484899              |
| SD28M3BX1B | 1                   | -3             | 75                    | GCT → OOO; 3 bp deletion within GCTGCTGCT tract          | EU485873              |
| D10M8H7    | 1                   | -1             | 100                   | 1 bp deletion; frameshift                                | EU484948              |
| D28M2HX31  | 1                   | 1              | 8                     | AGC → CGC                                                | EU485432              |
| D10M7J12   | 1                   | 1              | 9                     | GAG → GGG                                                | EU484996              |
| D14M1H10   | 1                   | 1              | 10                    | TTG → TCG                                                | EU485130              |
| D14M4S1    | 1                   | 1              | 10                    | TTG → TTT                                                | EU485274              |
| D10M11H10  | 1                   | 1              | 13                    | AAG → AAC                                                | EU484914              |
| D10M8B7    | 1                   | 1              | 13                    | AAG → AAC                                                | EU484889              |
| D28M3B03   | 1                   | 1              | 13                    | AAG → AAC                                                | EU485356              |
| D10M10B4   | 1                   | 1              | 15                    | GTA → GAA                                                | EU484850              |
| D10M11H7   | 1                   | 1              | 15                    | GTA → GAA                                                | EU484922              |
| D10M11H9   | 1                   | 1              | 41                    | GAT → GAG                                                | EU484924              |
| D10M7J2    | 1                   | 1              | 73                    | GCT → GTT                                                | EU484997              |
| D10M8H5    | 1                   | 1              | 73                    | GCT → GTT                                                | EU484946              |
| D28M2HX6B  | 1                   | 1              | 73                    | GCT → GTT                                                | EU485437              |
| D7M2H15    | 1                   | 1              | 73                    | GCT → GTT                                                | EU484741              |
| D14M5B9    | 1                   | 1              | 73                    | GCT → GTT                                                | EU485102              |
| D7M3H18    | 1                   | 1              | 73                    | GCT → GTT                                                | EU484745              |
| D14M3J11   | 1                   | 1              | 74                    | GTT → GGT                                                | EU485215              |
| D14M3J12   | 1                   | 1              | 74                    | GTT → GCT                                                | EU485216              |
| D7M2H14    | 1                   | 1              | 74                    | GTT → GGT                                                | EU484740              |
| D10M8B8    | 1                   | 1              | 75                    | GCT → GTT                                                | EU484890              |
| D14M3S1    | 1                   | 1              | 75                    | GCT → GTT                                                | EU485263              |
| D14M3S11   | 1                   | 1              | 75                    | GCT → GTT                                                | EU485265              |
| SD10M2JX3  | 1                   | 1              | 75                    | GCT → GTT                                                | EU485665              |
| SD10M3HX1  | 1                   | 1              | 75                    | GCT → GTT                                                | EU485628              |
| D10M11B2   | 1                   | 1              | 80                    | GAG → GGG                                                | EU484856              |
| D10M8S3    | 1                   | 1              | 80                    | GAG → GGG                                                | EU485064              |
| D10M9H12   | 1                   | 1              | 80                    | GAG → GGG, same as D10M9H2                               | EU484952              |
| D10M9H2    | 1                   | 1              | 80                    | GAG → GGG, same as D10M9H12                              | EU484953              |
| D10M9H8    | 1                   | 1              | 80                    | GAG → GGG                                                | EU484960              |
| D14M6S9    | 1                   | 1              | 84                    | GGG → AGG                                                | EU485254              |

| Clone Name    | No. codons affected | Nt differences | Codon(s) <sup>b</sup> | Sequence change(s) <sup>c</sup> | NCBI Accession Number |
|---------------|---------------------|----------------|-----------------------|---------------------------------|-----------------------|
| 1501C bladder | 1                   | 1              | 97                    | CAT → GAT                       | EU485526              |
| SD28M2HX3     | 1                   | 1              | 97                    | CAT → GAT                       | EU485922              |
| D14M6S10      | 1                   | 1              | 98                    | GCT → GGT                       | EU485249              |
| D7M2B03       | 1                   | 1              | 99                    | AAT → CAT                       | EU484626              |
| D7M5J10       | 1                   | 1              | 99                    | AAT → CAT                       | EU484796              |
| D7M6H05       | 1                   | 1              | 99                    | AAT → CAT                       | EU484728              |
| D7M6H07       | 1                   | 1              | 99                    | AAT → CAT                       | EU484730              |
| D28M1HX7      | 1                   | 1              | 123                   | AGT → AGC                       | EU485402              |
| SD28M2JX11    | 1                   | 1              | 127                   | ACG → ATG                       | EU485948              |
| D10M11J12     | 1                   | 1              | 132                   | GGT → GAT                       | EU484974              |
| D10M11J5      | 1                   | 1              | 132                   | GGT → GAT                       | EU484978              |
| D10M7S3       | 1                   | 1              | 132                   | GGT → GAT                       | EU485054              |
| SD28M1HX6     | 1                   | 1              | 137                   | GAG → GAC                       | EU485916              |
| D7M3B07       | 1                   | 1              | 144                   | GAG → GCG                       | EU484640              |
| D28M2HX32     | 1                   | 1              | 149                   | CCG → CCC                       | EU485433              |
| SD28M1HX12    | 1                   | 1              | 157                   | AAA → GAA                       | EU485907              |
| D10M10B12B    | 1                   | 1              | 159                   | GGG → GAT                       | EU484844              |
| D7M2B09       | 1                   | 1              | 159                   | GGG → GGT                       | EU484632              |
| D14M1H11      | 1                   | 1              | 166                   | GGT → AGT                       | EU485131              |
| M4E4A         | 1                   | 1              | 166                   | GGT → AGT                       | EU485483              |
| SD14M4E1      | 1                   | 1              | 166                   | AAG → TAG; stop codon           | EU485820              |
| SD28M1HX18    | 1                   | 1              | 167                   | CAG → CTG                       | EU485910              |
| D28M2HX30     | 1                   | 1              | 169                   | GAG → AAG                       | EU485431              |
| SD10M3JX4B    | 1                   | 1              | 170                   | ATG → AAG                       | EU485671              |
| D14M1H9       | 1                   | 1              | 175                   | CAG → CAT                       | EU485135              |
| D10M10J9      | 1                   | 1              | 185                   | ATG → AGG                       | EU484970              |
| 1251C skin    | 1                   | 1              | 194                   | AAG → AGG                       | EU485521              |
| D14M5H3       | 1                   | 1              | 194                   | AAG → AAT                       | EU485144              |
| D10M11H2      | 1                   | 1              | 195                   | AAG → GAG                       | EU484917              |
| D10M11H5      | 1                   | 1              | 195                   | AAG → GAG                       | EU484920              |
| D14M5H2       | 1                   | 1              | 195                   | GAT → GGT                       | EU485143              |
| D14M6J8       | 1                   | 1              | 195                   | AAG → AGG                       | EU485203              |
| 1302A skin    | 1                   | 1              | 196                   | GAG → GAT                       | EU485292              |
| D10M11H11     | 1                   | 1              | 196                   | GAT → GAG                       | EU484915              |
| D14M2J9       | 1                   | 1              | 196                   | GAT → GAG                       | EU485181              |
| M8E4A         | 1                   | 1              | 196                   | GAT → GAG                       | EU485485              |
| D28M2JX17     | 1                   | 1              | 199                   | GAG → GGG, same as D28M2JX7     | EU485472              |
| D28M2JX6      | 1                   | 1              | 199                   | GAG → GGG                       | EU485477              |
| D28M2JX7      | 1                   | 1              | 199                   | GAG → GGG, same as D28M2JX7     | EU485478              |
| D14M1H12      | 1                   | 1              | 201                   | GAG → AAG                       | EU485163              |
| D10M10J8      | 1                   | 1              | 202                   | AAG → GAG                       | EU484969              |
| D14M1S2       | 1                   | 1              | 202                   | AAG → GAG                       | EU485255              |
| D28M1J10      | 1                   | 1              | 202                   | AAG → AAC                       | EU485449              |
| SD28M1H01     | 1                   | 1              | 202                   | AAG → ACG                       | EU485902              |
| D14M2B8       | 1                   | 1              | 203                   | GAT → GCT                       | EU485117              |
| D28M1J06      | 1                   | 1              | 202                   | AAG → AAA                       | EU485447              |
| D10M12B1      | 1                   | 2              | 13                    | AAG → CAC                       | EU484863              |
| SD14M2H6      | 1                   | 2              | 40                    | GAT → ACT                       | EU485739              |
| D14M5H4       | 1                   | 2              | 79                    | GGG → AAG                       | EU485145              |
| 1255C skin    | 2                   | 2              | 96, 156               | GCT → GGT; GAT → GAG            | EU485523              |
| 1302B skin    | 1                   | 2              | 96                    | GCT → CAT                       | EU485293              |
| D28M2BX4      | 1                   | 2              | 166                   | GGT → GAG                       | EU485383              |
| SD14M2E1      | 1                   | 2              | 167                   | CAG → GAT                       | EU485838              |

| Clone Name    | No. codons affected | Nt differences | Codon(s) <sup>b</sup> | Sequence change(s) <sup>c</sup>         | NCBI Accession Number |
|---------------|---------------------|----------------|-----------------------|-----------------------------------------|-----------------------|
| D10M11B6      | 1                   | 2              | 196                   | GAT → GTA                               | EU484860              |
| M2B4A         | 1                   | 2              | 196                   | GAT→AAG                                 | EU485361              |
| D14M2H2       | 2                   | 2              | 13, 15                | AAGCTGGTA → AACCTGGAA                   | EU485738              |
| SD28M1HX19    | 2                   | 2              | 141, 169              | AAG → CAG; GAG → AAG                    | EU485911              |
| D14M1B12      | 2                   | 2              | 14-15                 | CTGGTA → CAGGAA                         | EU485083              |
| SD14M1E2      | 2                   | 2              | 15, 132               | GTA →GAA, GGT → GAT                     | EU485827              |
| 1375B SKIN    | 3                   | 2              | 160, 165              | GGT → AGT, TTT → TTG                    | EU485289              |
| D28M1HX1      | 2                   | 2              | 199, 202              | GAG → GAT, AAG → AAA                    | EU485409              |
| D14M5H11      | 2                   | 2              | 200, 203              | AAA → GAA; GCT → GAT                    | EU485141              |
| D14M5S9       | 2                   | 2              | 201, 203              | GAG → AAG; GCT → GAT                    | EU485247              |
| D14M4H3       | 2                   | 2              | 3, 10                 | GCT → CCT; TTC → TTT                    | EU485743              |
| D14M2H9       | 2                   | 2              | 8, 13                 | AGC → AGT; AAG → AGC                    | EU485760              |
| 1500B bladder | 2                   | 2              | 96-97                 | GCTCAT → GGTGAT                         | EU485525              |
| 1502D skin    | 2                   | 3              | 73, 167               | GCT→TTT; CAG → GAT                      | EU485528              |
| D21M2S05      | 3                   | 3              | 199-201               | GAGAAAGAG → GATAAGAAG                   | EU485323              |
| 1417A HEART   | 1                   | 3              | 41                    | GCT → OOO                               | EU485388              |
| 1417C HEART   | 1                   | 3              | 41                    | GCT → OOO                               | EU485390              |
| SD10M3HX4B    | 1                   | 3              | 97                    | apparent duplication of codon 96 (GCT)  | EU485638              |
| D28M2HX24     | 1                   | 3              | 98                    | OOO → GTC                               | EU485427              |
| SD14M4EX3     | 1                   | 3              | 98                    | OOO → CAT                               | EU485844              |
| 1498A bladder | 1                   | 3              | 99                    | OOO → CAT                               | EU485524              |
| SD28M2HX1     | 1                   | 3              | 99                    | OOO → CAT                               | EU485919              |
| 1388B skin    | 1                   | 3              | 132                   | OOO → GAT                               | EU485299              |
| D21M2S06A     | 1                   | 3              | 132                   | OOO → GAT                               | EU485333              |
| D28M1B02      | 1                   | 3              | 132                   | OOO → GAT                               | EU485348              |
| 1394D skin    | 1                   | 3              | 161                   | OOO → GCT                               | EU485502              |
| 1414B SKIN    | 1                   | 3              | 161                   | OOO → GGG                               | EU485969              |
| D28M1S01      | 1                   | 3              | 161                   | OOO → GCT                               | EU485978              |
| D28M1S10      | 1                   | 3              | 161                   | OOO → GGT                               | EU485512              |
| D28M2BX1      | 1                   | 3              | 161                   | OOO → GGT                               | EU485866              |
| D28M2BX18     | 1                   | 3              | 161                   | OOO → GGT                               | EU485380              |
| D28M2HX6      | 1                   | 3              | 161                   | OOO → GGG                               | EU485436              |
| SD28M3S K     | 1                   | 3              | 161                   | OOO → GGG                               | EU485981              |
| D28M1B10B     | 1                   | 3              | 162                   | OOO → GGC                               | EU485367              |
| D28M1H12      | 1                   | 3              | 162                   | OOO → GCT                               | EU485395              |
| D14M3B11      | 1                   | 3              | 195                   | OOO → GAT, 3 bp insertion               | EU485119              |
| D28M1J01      | 1                   | 3              | 197                   | OOO → GAG                               | EU485445              |
| D10M11B5      | 3                   | 3              | 11, 15, 51            | TTG → TCG; GTA → GAA; AAG → AGG         | EU484859              |
| D28M1HX5      | 3                   | 3              | 138,147, 165          | CAG → GAG; AAA → GAA; TTT → TTG         | EU485401              |
| SD28M1HX17    | 2                   | 3              | 140, 169              | GGA → GAA; GAG → GAA                    | EU485909              |
| D28M1H11      | 2                   | 3              | 144, 196              | GAG → GCG; GAT → AGT                    | EU485394              |
| D28M2BX10     | 2                   | 3              | 144, 199              | GAG → GCG; GAG → TAA                    | EU485375              |
| D10M10B12     | 2                   | 3              | 159, 190              | GGG → GAT; AAG → GAG                    | EU484843              |
| D21M2S06      | 3                   | 3              | 26, 136, 196          | TCA → TCG; GCT → GAT; GAT → GAG         | EU485324              |
| 1379C skin    | 1                   | 3              | 40, 42, 44            | GAT → GGT; GCA → GCG; GTT → GCT         | EU485849              |
| 1502F skin    | 2                   | 3              | 73, 167               | GCT → GTT; CAG → GAT                    | EU485530              |
| 1502G skin    | 2                   | 3              | 73, 167               | GCT → GTT; CAG → GAT                    | EU485531              |
| D14M1S7       | 3                   | 3              | 78, 97, 203           | ACA → ACT; CAT → GAT; GCT → GAT         | EU485257              |
| SD14M2E5      | 2                   | 4              | 157, 167              | AAA → GGA; CAG → TTG                    | EU485818              |
| SD14M1HX7     | 4                   | 4              | 120, 124, 126-127     | CAG → AAG; GCG →GTG; GTT →GCG; ACG →GCG | EU485757              |
| SD14M1E2      | 2                   | 4              | 15, 132               | GTA →GAA; OOO → GAT                     | EU485827              |
| SD14M2JX3     | 2                   | 4              | 15, 99                | GTA → GAA; OOO → CAT                    | EU485792              |

| Clone Name | No. codons affected | Nt differences | Codon(s) <sup>b</sup> | Sequence change(s) <sup>c</sup>            | NCBI Accession Number |
|------------|---------------------|----------------|-----------------------|--------------------------------------------|-----------------------|
| D10M8S1    | 2                   | 4              | 165, 167              | TTT → AAT; CAG → GCG                       | EU485061              |
| D14M1B8    | 2                   | 4              | 166, 199              | GGT → OOO; GAG → GAT                       | EU485087              |
| SD10M4BX6  | 2                   | 4              | 195, 199              | OOO → AAT; GAG → GAT                       | EU485626              |
| D14M5S2    | 2                   | 4              | 75, 78                | GCT → GTT; AAA → GCT                       | EU485241              |
| D7M6H10    | 3                   | 5              | 132, 158-159          | OOO → GAT; GATGGG → GAGGGT                 | EU484732              |
| SD10M2JX4  | 3                   | 5              | 15, 159-160           | GTA → GAA; GGGGGT → GACGAC                 | EU485666              |
| SD14M3B2   | 2                   | 5              | 157, 166              | AAA → TCT; GGT → TGA                       |                       |
| D28M2B04   | 2                   | 5              | 158, 161              | GAT → AAA; OOO → GGT                       | EU485371              |
| D14M5S3    | 4                   | 5              | 199, 201-203          | GAG → AAA; GAGAAGGCT → AAGAATGAT           | EU485242              |
| 1394C skin | 2                   | 5              | 77-78                 | GCTAAA → GAAOOO                            | EU485501              |
| D28M2HX19  | 4                   | 6              | 108, 138, 144, 162    | GCG → GCT; CAG → CAT; GAG → GCG; OOO → AAT | EU485422              |
| D14M1B2    | 3                   | 6              | 13-15                 | AAGCTGGTA → GCGAAAGAA                      | EU485084              |
| D28M1E9    | 2                   | 6              | 162, 197              | OOO → GCT; OOO → AAG                       | EU485491              |
| D14M2S10   | 3                   | 7              | 96, 98, 99            | GCT → GGT; OOOOOO → AATGCCT                | EU485259              |
| SD10M3HX3  | 5                   | 8              | 14, 26-29             | GTA → GAA; TCAAGTGGTACT → ATTAAGGGAGCT     | EU485637              |
| D14M1J5    | 6                   | 12             | 10 to 15              | TTGTTGGATAAGCTGGTA → TCTGCGGTTTCGCAAAGAA   | EU485773              |
| D14M1J6    | 6                   | 12             | 10 to 15              | TTGTTGGATAAGCTGGTA → TCTGCGGTTTCGCAAAGAA   | EU485774              |
| D14M1S1    | 6                   | 9              | 10 to 15              | TTGTTGGATAAGCTGGTA → TCTGCGGTTTCAGCAAAAA   | EU485227              |
| D14M1S4    | 6                   | 11             | 10 to 15              | TTGTTGGATAAGCTGGTA → TCTGCGGTTTCGCCAAGAA   | EU485228              |
| D14M1S6    | 6                   | 12             | 10 to 15              | TTGTTGGATAAGCTGGTA → TCTGCGGTTTCGCAAAGAA   | EU485229              |
| D14M1S8    | 5                   | 9              | 10-11, 13-15          | TTGTTGGATAAGCTGGTA → TCTGCGGATCAGAAAGAA    | EU485230              |
| D14M2H8    | 6                   | 10             | 10 to 15              | TTGTTGGATAAGCTGGTA → TCTGCGGTTTCGCAAGGAA   | EU485741              |

<sup>a</sup> An example of the analysis of a *B. burgdorferi vlsE* variant with a template-independent sequence modification is presented in Fig. S1.

<sup>b</sup> Codon numbering corresponds to the location in the aligned cassette sequences as first described in Fig. 3 of [22] and also depicted in Fig. S1 of this article.

<sup>c</sup> The sequences of the parental clone and of the recovered variant with template-independent change are separated by an arrow. In clones in which there are more than one template-independent change, they are provided in the same order as shown in the Codon(s) column. Relative deletions/insertions are indicated as "O".
