# Supplementary material for: Detailed Analysis of Sequence Changes Occurring during vlsE Antigenic Variation in the Mouse Model of Borrelia burgdorferi Infection
Source: PubMed Central journal article supplement (PMC2632889; doi:10.1371/journal.ppat.1000293), 2009-02-13
Supplement: ppat.1000293.s003.pdf [file ppat.1000293.s003.pdf]

**Table S3.** Comparison of the base changes occurring in ‘templated’ vs. ‘template-independent’ single nucleotide changes in *vsE* variants. <sup>a</sup>

| <b>‘Templated’ single nucleotide changes (N = 33)</b>                                                                                                                                                                                  |   |                                |           |           |          |
|----------------------------------------------------------------------------------------------------------------------------------------------------------------------------------------------------------------------------------------|---|--------------------------------|-----------|-----------|----------|
|                                                                                                                                                                                                                                        |   | Nucleotide change (proportion) |           |           |          |
| Initial nucleotide                                                                                                                                                                                                                     |   | A                              | T         | G         | C        |
|                                                                                                                                                                                                                                        | A |                                | 0 (0)     | 10 (0.30) | 3 (0.09) |
|                                                                                                                                                                                                                                        | T | 0 (0)                          |           | 2 (0.06)  | 0 (0)    |
|                                                                                                                                                                                                                                        | G | 4 (0.12)                       | 2 (0.06)  |           | 0 (0)    |
|                                                                                                                                                                                                                                        | C | 11 (0.33)                      | 0 (0)     | 1 (0.03)  |          |
| <b>‘Template-independent’ single nucleotide changes (N = 76)</b>                                                                                                                                                                       |   |                                |           |           |          |
|                                                                                                                                                                                                                                        |   | Nucleotide change (proportion) |           |           |          |
| Initial nucleotide                                                                                                                                                                                                                     |   | A                              | T         | G         | C        |
|                                                                                                                                                                                                                                        | A |                                | 2 (0.03)  | 17 (0.22) | 8 (0.11) |
|                                                                                                                                                                                                                                        | T | 3 (0.04)                       |           | 7 (0.09)  | 3 (0.04) |
|                                                                                                                                                                                                                                        | G | 10 (0.13)                      | 5 (0.07)  |           | 6 (0.08) |
|                                                                                                                                                                                                                                        | C | 0 (0)                          | 12 (0.16) | 3 (0.04)  |          |
| <p>a For the ‘templated’ group, well-defined single nucleotide changes that were clearly separate from other sequence variations were used. Shaded boxes indicate those changes that differed substantially between the two types.</p> |   |                                |           |           |          |
