# Supplementary material for: Detailed Analysis of Sequence Changes Occurring during vlsE Antigenic Variation in the Mouse Model of Borrelia burgdorferi Infection
Source: PubMed Central journal article supplement (PMC2632889; doi:10.1371/journal.ppat.1000293), 2009-02-13
Supplement: ppat.1000293.s005.pdf [file ppat.1000293.s005.pdf]

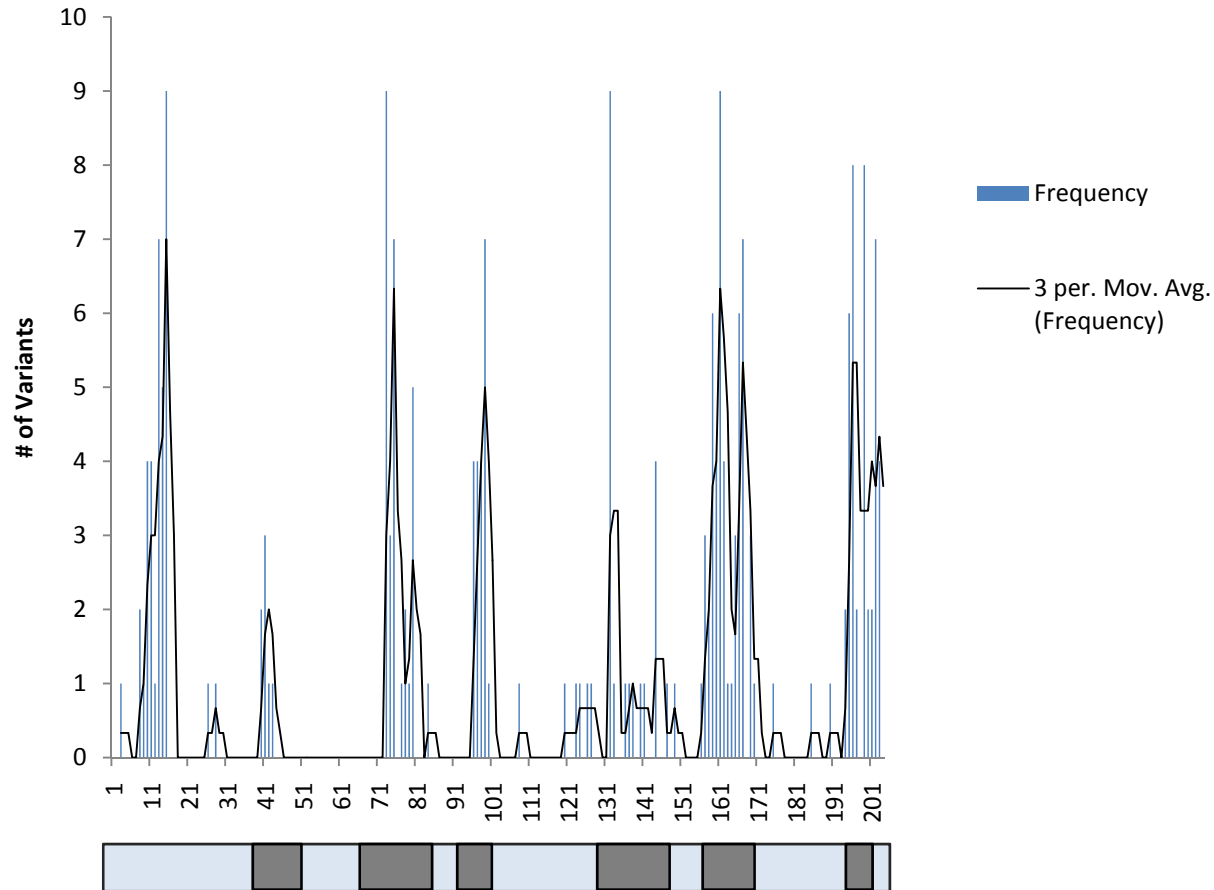

Fig. S2. Locations of template-independent sequence variation. The X-axis numbers represent the codon number of each amino acid in *vlsE* as presented in figure 3 of [22]. The dark blue bars represent the number of variants recovered at each codon. The black line represents a 3 point moving average. In the diagram below the graph, the light areas indicate the locations of the invariable regions of *vlsE* while the dark areas indicate the positions of the variable regions of *vlsE*.
