# Supplementary material for: Detailed Analysis of Sequence Changes Occurring during vlsE Antigenic Variation in the Mouse Model of Borrelia burgdorferi Infection
Source: PLoS Pathog. 2009 Feb 13;5(2):e1000293. doi: 10.1371/journal.ppat.1000293 (PMC2632889; doi:10.1371/journal.ppat.1000293)
Supplement: Table S2 — B. burgdorferi vlsE variant clones with sequences consistent with a single recombination event. (0.11 MB PDF) [file ppat.1000293.s002.pdf]

**Table S2.** *B. burgdorferi* *vlsE* variant clones with sequences consistent with a single recombination event.

| Clone                          | Potential <i>vls</i> Cassette(s) Used (Longest Max. Recombination) | Nonambiguous (Only One Possible Cassette) | 5' Extension for Max. Recombination (nt) | Minimum recombination (nt) | 3' Extension for Max. Recombination (nt) | Maximum recombination (nt) | NCBI Accession Number |
|--------------------------------|--------------------------------------------------------------------|-------------------------------------------|------------------------------------------|----------------------------|------------------------------------------|----------------------------|-----------------------|
| D7M4B02                        | 7                                                                  | Yes                                       | 97                                       | -6                         | 8                                        | 99                         | EU484643              |
| SD14M3B3<br>(same as D28M1B3b) | 9                                                                  | Yes                                       | 25                                       | 1                          | 2                                        | 28                         | EU485400              |
| D7M4J13                        | 9                                                                  | Yes                                       | 25                                       | 1                          | 9                                        | 35                         | EU484817              |
| D10M11S2                       | 5                                                                  | Yes                                       | 32                                       | 1                          | 4                                        | 37                         | EU485035              |
| D7M6H03                        | 5                                                                  | Yes                                       | 32                                       | 1                          | 4                                        | 37                         | EU484726              |
| D7M5J13                        | 12                                                                 | Yes                                       | 89                                       | 1                          | 15                                       | 105                        | EU484821              |
| SD10M3HX9                      | 11                                                                 | Yes                                       | 11                                       | 2                          | 10                                       | 23                         | EU485646              |
| D7M3J06                        | 13                                                                 | Yes                                       | 80                                       | 3                          | 0                                        | 83                         | EU484777              |
| SD14M2JX4                      | 13                                                                 | Yes                                       | 13                                       | 3                          | 80                                       | 96                         | EU485799              |
| D10M11B1                       | 5                                                                  | Yes                                       | 32                                       | 6                          | 81                                       | 119                        | EU484853              |
| SD14M4H3                       | 9                                                                  | Yes                                       | 77                                       | 7                          | 8                                        | 92                         | EU485743              |
| D7M1H03                        | 7                                                                  | Yes                                       | 6                                        | 8                          | 76                                       | 90                         | EU484689              |
| D7M1H04                        | 7                                                                  | Yes                                       | 6                                        | 8                          | 76                                       | 90                         | EU484690              |
| D10M9B11                       | 13                                                                 | Yes                                       | 76                                       | 8                          | 8                                        | 92                         | EU484891              |
| D7M4B03                        | 9                                                                  | Yes                                       | 86                                       | 8                          | 31                                       | 125                        | EU484644              |
| D7M6J10                        | 9                                                                  | Yes                                       | 86                                       | 8                          | 31                                       | 125                        | EU484799              |
| D10M11S5                       | 4                                                                  | Yes                                       | 13                                       | 10                         | 25                                       | 48                         | EU485038              |
| D10M9J5                        | 4                                                                  | Yes                                       | 13                                       | 10                         | 25                                       | 48                         | EU485019              |
| D7M6J05                        | 14                                                                 | Yes                                       | 0                                        | 10                         | 76                                       | 86                         | EU484798              |
| D7M2J05                        | 10                                                                 | Yes                                       | 2                                        | 11                         | 6                                        | 19                         | EU484770              |
| SD14M1HX5                      | 3                                                                  | Yes                                       | 12                                       | 11                         | 76                                       | 99                         | EU485766              |
| SD28M1S06                      | 11                                                                 | Yes                                       | 11                                       | 13                         | 17                                       | 41                         | EU485973              |
| D7M1B09                        | 15                                                                 | Yes                                       | 5                                        | 13                         | 54                                       | 72                         | EU484622              |
| 1395F skin                     | 8                                                                  | Yes                                       | 69                                       | 13                         | 17                                       | 99                         | EU485966              |
| D10M9H4                        | 13                                                                 | Yes                                       | 0                                        | 14                         | 7                                        | 21                         | EU484957              |
| D10M9H6                        | 13                                                                 | Yes                                       | 1                                        | 14                         | 7                                        | 22                         | EU484959              |
| D7M2J12                        | 5                                                                  | Yes                                       | 76                                       | 14                         | 7                                        | 97                         | EU484807              |
| D10M10J3                       | 7                                                                  | Yes                                       | 7                                        | 15                         | 6                                        | 28                         | EU484967              |
| D7M3B12                        | 12                                                                 | Yes                                       | 0                                        | 16                         | 9                                        | 25                         | EU484671              |
| D10M11B4                       | 9                                                                  | Yes                                       | 77                                       | 16                         | 7                                        | 100                        | EU484858              |
| SD10M1EX5                      | 8                                                                  | Yes                                       | 21                                       | 16                         | 79                                       | 116                        | EU485701              |
| SD14M1BX3                      | 10                                                                 | Yes                                       | 1                                        | 17                         | 86                                       | 104                        | EU485720              |
| D7M1J08                        | 10                                                                 | Yes                                       | 21                                       | 19                         | 86                                       | 126                        | EU484763              |
| SD10M1EX11                     | 10                                                                 | Yes                                       | 21                                       | 19                         | 86                                       | 126                        | EU485697              |
| D10M8J9                        | 12                                                                 | Yes                                       | 83                                       | 20                         | 7                                        | 110                        | EU485012              |
| D28M3B04                       | 4                                                                  | Yes                                       | 25                                       | 21                         | 9                                        | 55                         | EU485357              |
| D10M7B6                        | 6                                                                  | Yes                                       | 39                                       | 22                         | 63                                       | 124                        | EU484877              |
| D10M11H4                       | 6                                                                  | Yes                                       | 61                                       | 22                         | 83                                       | 166                        | EU484919              |
| D7M6J14                        | 6                                                                  | Yes                                       | 8                                        | 23                         | 61                                       | 92                         | EU484828              |
| D7M4H03                        | 9                                                                  | Yes                                       | 40                                       | 38                         | 2                                        | 80                         | EU484710              |
| SD14M2H7                       | 5                                                                  | Yes                                       | 30                                       | 38                         | 76                                       | 144                        | EU485740              |
| D7M6J16                        | 7                                                                  | Yes                                       | 6                                        | 40                         | 33                                       | 79                         | EU484830              |
| SD28M4HX8                      | 15                                                                 | Yes                                       | 17                                       | 46                         | 9                                        | 72                         | EU485941              |

| Clone      | Potential v/s Cassette(s) Used (Longest Max. Recombination) | Nonambiguous (Only One Possible Cassette) | 5' Extension for Max. Recombination (nt) | Minimum recombination (nt) | 3' Extension for Max. Recombination (nt) | Maximum recombination (nt) | NCBI Accession Number |
|------------|-------------------------------------------------------------|-------------------------------------------|------------------------------------------|----------------------------|------------------------------------------|----------------------------|-----------------------|
| 1379D skin | 6                                                           | Yes                                       | 63                                       | 55                         | 61                                       | 179                        | EU485850              |
| D28M3B02   | 6                                                           | Yes                                       | 63                                       | 55                         | 61                                       | 179                        | EU485355              |
| SD28M3BX2  | 6                                                           | Yes                                       | 63                                       | 55                         | 61                                       | 179                        | EU485874              |
| SD10M4BX7  | 7                                                           | Yes                                       | 4                                        | 82                         | 8                                        | 94                         | EU485627              |
| SD28M3JX1  | 9                                                           | Yes                                       | 6                                        | 89                         | 8                                        | 103                        | EU485956              |
| D10M10B2   | 15                                                          | Yes                                       | 54                                       | 93                         | 18                                       | 165                        | EU484845              |
| D10M10J10  | 11                                                          | Yes                                       | 6                                        | 98                         | 7                                        | 111                        | EU484962              |
| D4M5S02    | 3                                                           | Yes                                       | 21                                       | 102                        | 8                                        | 131                        | EU484594              |
| D14M2B1    | 4                                                           | Yes                                       | 62                                       | 347                        | 10                                       | 419                        | EU485089              |
| D10M9J3    | 7,(8)                                                       | No                                        | 75                                       | -3                         | 9                                        | 81                         | EU485018              |
| SD7M2HX3   | 3-7,(6),9,11-14,16                                          | No                                        | 24                                       | -3                         | 63                                       | 84                         | EU485018              |
| SD28M3BX7  | 3-7,9,11,(12),13,14,16                                      | No                                        | 72                                       | -3                         | 16                                       | 85                         | EU485881              |
| D14M5S9    | (2),5,7,11,13                                               | No                                        | 3                                        | 1                          | 7                                        | 11                         | EU485247              |
| SD10M3HX16 | (2),5,7,11,13                                               | No                                        | 3                                        | 1                          | 8                                        | 12                         | EU485634              |
| D7M5B05    | 10,12, (14)                                                 | No                                        | 7                                        | 1                          | 7                                        | 15                         | EU484654              |
| D7M2B08    | 2-5,7,9,11,12,13(14)                                        | No                                        | 11                                       | 1                          | 7                                        | 19                         | EU484631              |
| D7M4J11    | 2-5,7,9,11,12,13(14)                                        | No                                        | 11                                       | 1                          | 7                                        | 19                         | EU484815              |
| D10M7S8    | 5,7,(8),10,16                                               | No                                        | 16                                       | 1                          | 13                                       | 30                         | EU485059              |
| D7M3J07    | 5,7,(8),10,16                                               | No                                        | 16                                       | 1                          | 13                                       | 30                         | EU484778              |
| SD14M3HX5  | 5,7,(9),10                                                  | No                                        | 6                                        | 1                          | 31                                       | 38                         | EU485764              |
| SD28M4HX7  | 2,(4),11,13                                                 | No                                        | 41                                       | 1                          | 4                                        | 46                         | EU485940              |
| SD14M3J11  | 3,4,6,11,12,13,(14),15                                      | No                                        | 15                                       | 1                          | 48                                       | 64                         | EU485795              |
| D7M3J17    | 9,12,(13),15                                                | No                                        | 46                                       | 1                          | 20                                       | 67                         | EU484814              |
| D10M7J6    | 3-5,8,9,11,13,(15)                                          | No                                        | 17                                       | 1                          | 54                                       | 72                         | EU484999              |
| SD14M3J6   | 3,4,5,8,9,11,13,(15)                                        | No                                        | 17                                       | 1                          | 54                                       | 72                         | EU485780              |
| D14M5S7    | (4),5,9,10,11,12,14,15,16                                   | No                                        | 61                                       | 1                          | 22                                       | 84                         | EU485245              |
| D10M10B11  | 3,5,(6),7,9,11,14                                           | No                                        | 8                                        | 1                          | 79                                       | 88                         | EU484842              |
| SD14M4H2   | (3),11,13                                                   | No                                        | 75                                       | 1                          | 12                                       | 88                         | EU485742              |
| D10M7S6    | (10),14                                                     | No                                        | 6                                        | 1                          | 83                                       | 90                         | EU485057              |
| D7M4H07    | (10), 14                                                    | No                                        | 6                                        | 1                          | 83                                       | 90                         | EU484714              |
| D10M11H12  | 3,5,(6),7,9,11,14                                           | No                                        | 8                                        | 1                          | 83                                       | 92                         | EU484916              |
| SD14M1HX8  | 4,5,(14)                                                    | No                                        | 7                                        | 1                          | 88                                       | 96                         | EU485758              |
| D10M10J1   | 4-7,9,(10),11,14-16                                         | No                                        | 20                                       | 1                          | 77                                       | 98                         | EU484961              |
| SD14M3HX3  | 4,5,6,7,9,(10),11,14,16                                     | No                                        | 20                                       | 1                          | 77                                       | 98                         | EU485763              |
| D10M7B2    | 2-3,(4),5-9,13,15,16                                        | No                                        | 80                                       | 1                          | 18                                       | 99                         | EU484875              |
| D10M8J10   | 2,3,(4),5-9,13,15,16                                        | No                                        | 80                                       | 1                          | 18                                       | 99                         | EU485004              |
| D7M1J01    | 2-3,(4),5-9,13,15,16                                        | No                                        | 80                                       | 1                          | 18                                       | 99                         | EU484759              |

| Clone          | Potential v/s<br>Cassette(s) Used<br>(Longest Max.<br>Recombination) | Nonambiguous<br>(Only One<br>Possible<br>Cassette) | 5' Extension for<br>Max.<br>Recombination<br>(nt) | Minimum<br>recombination<br>(nt) | 3' Extension for<br>Max.<br>Recombination<br>(nt) | Maximum<br>recombination<br>(nt) | NCBI Accession<br>Number |
|----------------|----------------------------------------------------------------------|----------------------------------------------------|---------------------------------------------------|----------------------------------|---------------------------------------------------|----------------------------------|--------------------------|
| SD14M2J12      | 2-9,13,15,16(4)                                                      | No                                                 | 80                                                | 1                                | 18                                                | 99                               | EU485776                 |
| D10M10J23      | 2,3,6,8,11,(12),1<br>3,15,16                                         | No                                                 | 89                                                | 1                                | 15                                                | 105                              | EU484966                 |
| D7M1B03        | 2-3,6,8,11,(12),<br>13,15,16                                         | No                                                 | 89                                                | 1                                | 15                                                | 105                              | EU484618                 |
| D7M1J11        | 2-3,6,8,11,(12),<br>13,15,16                                         | No                                                 | 89                                                | 1                                | 15                                                | 105                              | EU484800                 |
| D10M11S3       | (7),9                                                                | No                                                 | 10                                                | 2                                | 25                                                | 37                               | EU485036                 |
| D10M11J7       | 7,9,10,11,(12)                                                       | No                                                 | 13                                                | 2                                | 33                                                | 48                               | EU484979                 |
| D10M12S3       | 7,9,10,11,(12)                                                       | No                                                 | 13                                                | 2                                | 33                                                | 48                               | EU485047                 |
| SD28M1HX1      | 7,9,10,11,(12)                                                       | No                                                 | 13                                                | 2                                | 33                                                | 48                               | EU485906                 |
| D7M2J08        | 3,8,(11),13-16                                                       | No                                                 | 17                                                | 2                                | 32                                                | 51                               | EU484773                 |
| SD10M4BX5      | 6,(8),12                                                             | No                                                 | 11                                                | 2                                | 73                                                | 86                               | EU485625                 |
| SD14M1BX7      | 6,(8),12                                                             | No                                                 | 11                                                | 2                                | 73                                                | 86                               | EU485723                 |
| SD7M2JX10      | 2,(4),12                                                             | No                                                 | 0                                                 | 2                                | 88                                                | 90                               | EU485589                 |
| D10M7J4        | (8),13                                                               | No                                                 | 10                                                | 2                                | 85                                                | 97                               | EU484998                 |
| D10M9H11       | (6),9                                                                | No                                                 | 63                                                | 2                                | 63                                                | 128                              | EU484951                 |
| D10M10S5       | 3,4,(6),13-15                                                        | No                                                 | 79                                                | 3                                | 18                                                | 100                              | EU485027                 |
| D10M7H4        | 3,4,(6),13,14,15                                                     | No                                                 | 79                                                | 3                                | 18                                                | 100                              | EU484939                 |
| SD10M2BX10     | 3,4,(6),13,14,15                                                     | No                                                 | 79                                                | 3                                | 18                                                | 100                              | EU485603                 |
| SD14M2B2       | 3,4,(6),13,14,15                                                     | No                                                 | 79                                                | 3                                | 18                                                | 100                              | EU485710                 |
| SD28M4BX20     | 3,4,(6),13,14,15                                                     | No                                                 | 79                                                | 3                                | 18                                                | 100                              | EU485893                 |
| D7M5J07        | 3,4,10,11,(12)                                                       | No                                                 | 10                                                | 3                                | 88                                                | 101                              | EU484794                 |
| SD7M2JX1       | 3,4,10,(12)                                                          | No                                                 | 10                                                | 3                                | 88                                                | 101                              | EU485575                 |
| D10M12B1       | 2,(4),5,9,11,12                                                      | No                                                 | 12                                                | 3                                | 88                                                | 103                              | EU484863                 |
| D10M12B7       | 2,(4),5,9,11,12                                                      | No                                                 | 12                                                | 3                                | 88                                                | 103                              | EU484871                 |
| SD10M3HX1<br>0 | 2,6,8,(16)                                                           | No                                                 | 8                                                 | 4                                | 16                                                | 28                               | EU485630                 |
| D14M2S9        | 3,4,5,(6),8,12,14                                                    | No                                                 | 16                                                | 4                                | 86                                                | 106                              | EU485236                 |
| SD10M4HX2      | 9,(12)                                                               | No                                                 | 7                                                 | 5                                | 8                                                 | 20                               | EU485648                 |
| D7M6J12        | (9),11                                                               | No                                                 | 31                                                | 5                                | 4                                                 | 40                               | EU484826                 |
| D10M8J3        | (3),4,5,13                                                           | No                                                 | 13                                                | 5                                | 30                                                | 48                               | EU485006                 |
| D10M9B22       | (3),4,5,13                                                           | No                                                 | 13                                                | 5                                | 30                                                | 48                               | EU484894                 |
| SD14M2JX1      | (3),4,5,13                                                           | No                                                 | 13                                                | 5                                | 30                                                | 48                               | EU485788                 |
| D14M1J2        | 4,5                                                                  | No                                                 | 2                                                 | 5                                | 61                                                | 68                               | EU485171                 |
| SD28M2JX7      | 5,9,(11)                                                             | No                                                 | 6                                                 | 5                                | 76                                                | 87                               | EU485954                 |
| SD14M1BX10     | 13,(14)                                                              | No                                                 | 76                                                | 5                                | 11                                                | 92                               | EU485717                 |
| SD14M4E2       | 13,(14)                                                              | No                                                 | 76                                                | 5                                | 11                                                | 92                               | EU485821                 |
| D7M1B12        | (3),8,10,13,16                                                       | No                                                 | 21                                                | 6                                | 7                                                 | 34                               | EU484666                 |
| SD7M1JX1       | 2-5,(7),810-<br>14,16                                                | No                                                 | 33                                                | 6                                | 7                                                 | 46                               | EU485574                 |
| D10M12H2       | 5,9,(11)                                                             | No                                                 | 6                                                 | 6                                | 75                                                | 87                               | EU484927                 |
| D10M11S8       | 3,4,(6),11,13,15                                                     | No                                                 | 3                                                 | 7                                | 61                                                | 71                               | EU485041                 |
| D14M1J4        | 4,5                                                                  | No                                                 | 16                                                | 8                                | 61                                                | 85                               | EU485172                 |
| D10M7J8        | 2,3,6,8,13,(15),1<br>6                                               | No                                                 | 80                                                | 10                               | 9                                                 | 99                               | EU485001                 |
| SD28M4HX6      | 2,3,6,8,13,(15),1<br>6                                               | No                                                 | 80                                                | 10                               | 9                                                 | 99                               | EU485939                 |
| SD10M3HX15     | (7),10                                                               | No                                                 | 19                                                | 12                               | 33                                                | 64                               | EU485633                 |

| Clone      | Potential v/s<br>Cassette(s) Used<br>(Longest Max.<br>Recombination) | Nonambiguous<br>(Only One<br>Silent Cassette) | 5' Extension for<br>Max.<br>Recombination<br>(nt) | Minimum<br>recombination<br>(nt) | 3' Extension for<br>Max.<br>Recombination<br>(nt) | Maximum<br>recombination<br>(nt) | NCBI Accession<br>Number |
|------------|----------------------------------------------------------------------|-----------------------------------------------|---------------------------------------------------|----------------------------------|---------------------------------------------------|----------------------------------|--------------------------|
| D7M6B02    | (2),7                                                                | No                                            | 83                                                | 14                               | 7                                                 | 104                              | EU484658                 |
| SD28M1HX2  | (7),10                                                               | No                                            | 19                                                | 12                               | 33                                                | 64                               | EU485912                 |
| D10M10S11  | (2),10                                                               | No                                            | 34                                                | 18                               | 9                                                 | 61                               | EU485023                 |
| D7M1B10    | 3,4,(13)                                                             | No                                            | 5                                                 | 19                               | 30                                                | 54                               | EU484623                 |
| 1395A skin | 3,11,(13)                                                            | No                                            | 0                                                 | 20                               | 10                                                | 30                               | EU485962                 |

a All silent cassettes that could have served as template for the recombination event are listed. If only one silent cassette was identical with the minimum recombination region, the recombination event was considered unambiguous. In ambiguous cases, all silent cassettes listed could have served as the template for the recombination event (i.e. have identical minimum recombination regions). The silent cassette with the longest possible maximum recombination (in parentheses) was selected for calculation of maximum recombination values shown. All values represent the minimum and maximum recombination event lengths in the variant sequence. Negative numbers in the minimum recombination column represent deletions in the variant sequence relative to the parent sequence.
